# Supplementary material for: Development of Highly Efficient Universal Pneumocystis Primers and Their Application in Investigating the Prevalence and Genetic Diversity of Pneumocystis in Wild Hares and Rabbits
Source: MDPI journal article supplement (doi:10.3390/jof10050355), 2024-05-15
Supplement: s1 [file s1]

**Supplemental Table S2. PCR primers used in this study.**

| Names               | Sequences (5'→3') <sup>a</sup>   | Targets                 | References |
|---------------------|----------------------------------|-------------------------|------------|
| SSU.f1              | CCTACAGCTACCTTATTTCTGA           | mtSSU                   | [35]       |
| SSU.r1              | ATGRAGTGGGCTACAGACGTG            | mtSSU                   | [35]       |
| rns.f4              | TTCAGCTACAGGTTC                  | mtSSU                   | This study |
| rns.f6b             | YRGACGTCTGTAGCCCACT              | mtSSU                   | This study |
| rns.f9              | TTCCCCTACAGCTACCTTA              | mtSSU                   | This study |
| rns.f8              | GCGCTTGACGAGTAGTTAGT             | mtSSU                   | This study |
| rn3.r3              | ATCTGTGATGTACTAACTAC             | mtSSU                   | This study |
| rns.r10             | CAAAACATTAGACGGTCACAG            | mtSSU                   | This study |
| rns.r13             | AGATACCCTTGTAGTTTATGCTG          | mtSSU                   | This study |
| ml.r8               | AGGAAAAGAAATCAACCGAGA            | mtLSU                   | This study |
| LSU.f1              | CTCATGTCAGCATTCTCTCTTA           | mtLSU                   | This study |
| LSU.r1              | TAGGATATAGCTGGTTTTCTGCGA         | mtLSU                   | This study |
| ml.f1c              | CCCAACTCACGTAACCTTTTA            | mtLSU                   | This study |
| ml.f3               | TTTGCCGAGTTCCTT                  | mtLSU                   | This study |
| ml.f10              | AACGTTACTCATGTCAGCA              | mtLSU                   | This study |
| ml.f11              | TACTAAATGTTCTGCTACC              | mtLSU                   | This study |
| ml.r4               | GGTTACGTGAGTTGGGT                | mtLSU                   | This study |
| ml.r12              | ACCGTGAGGGAAAGTTGA               | mtLSU                   | This study |
| Pu3Y. <sup>fb</sup> | TACAAATCGRACTAGGATAT             | mtLSU                   | This study |
| Pu7rev              | GATGGCTGTTTCCAAG                 | mtLSU                   | [33]       |
| pAZ102-E            | GATGGCTGTTTCCAAGCCCA             | mtLSU                   | [34]       |
| pAZ102-H            | GTGTACGTTGCAAAGTACTC             | mtLSU                   | [34]       |
| nad5.r6             | CCWAWWGMWACAAACATCATWCC          | <i>nad5</i>             | This study |
| nad5.f6             | TGTTWCARTTRGGWATGATGTTTGT        | <i>nad5</i>             | This study |
| cob.r8              | GGATTAGCCATRATRTAATTATCRCTATG    | <i>cob</i>              | This study |
| cob.f8              | CATAGYGATAATTAYATYATGGCTAATCC    | <i>cob</i>              | This study |
| rns.cox1.f5         | GGWACTARCCAATTWCCAAATC           | <i>cox1</i>             | This study |
| cox1.r5             | TDGGWGGATTGGWAATTGG              | <i>cox1</i>             | This study |
| mt.r103c            | GCATCCWTCAAYGTGACAAATTGA         | mtDNA non-coding region | This study |
| dhps.f7             | GGTGTTTCATTCATATGATTC            | <i>dhps</i>             | This study |
| dhps.f6             | CCRRTTTTRCCATTYTTA               | <i>dhps</i>             | This study |
| dhps.r6             | CCTCTCATRTGCATTATACATATYGG       | <i>dhps</i>             | This study |
| dhps.r7             | AYCCTGTAAAYCTTTT                 | <i>dhps</i>             | This study |
| dhps.r8             | CCAGGRTCYAAAATAATRTTCCA          | <i>dhps</i>             | This study |
| dhps.r9             | AATAWAHYYYTTTCCARATAGCATC        | <i>dhps</i>             | This study |
| PK.f1               | CAARTTRTCAGAAGAAAAGATGGT         | <i>pppk</i>             | This study |
| PK.f2               | TRAAAACRTCTATGTTRTATGAATC        | <i>pppk</i>             | This study |
| PK160               | GTTAATCCTGGTATTAAACCAGTTTTGCCATT | <i>pppk</i>             | [32]       |
| 16S.f4              | CGCTACTACCGATTGAATGGC            | 18S rRNA                | This study |
| ITS1.F              | TTRCTGGRAAGTTGATCAAAT            | 18S rRNA                | This study |

|            |                          |             |            |
|------------|--------------------------|-------------|------------|
| ITS1-1f    | TCAAATTTGGTCATTTAGAGG    | 18S rRNA    | This study |
| 26S.r1     | TGCCACGTTCTTCATCGAC      | 5.8S rRNA   | This study |
| Fun.ITS4   | TCCTCCGCTTATTGATATGC     | 28S rRNA    | [36]       |
| 26S.r8     | GGCTTAATCTCAGCAGATC      | 28S rRNA    | This study |
| 16SrRNA.r1 | CTGGCTTCACCCTATTCAGG     | 28S rRNA    | This study |
| PCP18S.f3  | GAATGGCTCATTATATCAGTTATA | 18S rRNA    | This study |
| Nu26S.f9   | CACGGACCAAGGAGTCTAATA    | 28S rRNA    | This study |
| PCP28S.r1  | CAARGGCTTAATCTCAGCAGA    | 28S rRNA    | This study |
| CTB.f3     | ATGACCAACATYCGYAAAAC     | <i>cytb</i> | This study |
| CTB.r3     | AATGATATTTGBCCTCATGG     | <i>cytb</i> | This study |

<sup>a</sup> Non-standard nucleotides represent degenerate codes. All primers are for *Pneumocystis* except for the last two (CTB.f3 and CTB.r3) which are shared between the host hares and rabbits.

<sup>b</sup> Modified from Riedbold *et al.* [32] by incorporating a degenerate nucleotide R at the 10th position. Abbreviations: mtSSU, mitochondrial small-subunit rRNA gene; mtLSU, mitochondrial large-subunit rRNA gene; *cob*, apocytochrome b; *nad5*, NADH dehydrogenase subunit 5; *cox1*, cytochrome oxidase subunit 1; *cytb*, cytochrome b gene (from mammals), mtDNA, mitochondrial genome DNA; *dhps*, dihydropteroate synthase gene; *pppk*, dihydro-6-hydroxymethylpterin pyrophosphokinase gene; ITS1-5.8S-ITS2, nuclear internal transcribed spacer 1, 5.8S rRNA and internal transcribed spacer 2.
