# Supplementary material for: Development of Highly Efficient Universal Pneumocystis Primers and Their Application in Investigating the Prevalence and Genetic Diversity of Pneumocystis in Wild Hares and Rabbits
Source: MDPI journal article supplement (doi:10.3390/jof10050355), 2024-05-15
Supplement: s1 [file s1]

**ms.r13** →

|                    |     |                |                                                                              |                                                    |     |
|--------------------|-----|----------------|------------------------------------------------------------------------------|----------------------------------------------------|-----|
| Pj_NC_020331       | 674 | AAGCATTATTTCTA | GGTAACGACTGACATTGAGGTACGTA                                                   | GGCATAAGTAGCGAAAAGGATTAGATACCCCTTGTAAGTTTATGCTGTAA | 760 |
| Pmac_MIT726214     | 591 | AAGCATTATTTCTA | AGTACGACTGACATTGAGGTACGTA                                                    | AGCATAAGTAGCGAAAAGGATTAGATACCCCTTGTAAGTTTATGCTGTAA | 677 |
| Pcan_CK1_MIT726215 | 598 | AAGCATTATTTCTA | ATTAACGACTGACATTAGGTACGTAAGCATAAGTAGCGAAAAGGATTAGATACCCCTTGTAAGTTTATGCTGTAA  | 684                                                |     |
| Pcan_CK2_MIT726216 | 599 | AAGCATTATTTCTA | AGTACGACTGACATTGAGGTACGTAAGCATAAGTAGCGAAAAGGATTAGATACCCCTTGTAAGTTTATGCTGTAA  | 685                                                |     |
| Pory_MIT726213     | 612 | AAGCATTATTTCTA | ATTAACGACTGACATTGAGGTACGTAAGCATAAGTAGCGAAAAGGATTAGATACCCCTTGTAAGTTTATGCTGTAA | 698                                                |     |
| Pc_JX499145        | 580 | AAGCATTATTTCTA | ATTAACGACTGACATTGAGGTACGTAAGCATAAGTAGCGAAAAGGATTAGATACCCCTTGTAAGTTTATGCTGTAA | 666                                                |     |
| Pw_MIT726211       | 741 | AAGCATTATTTCTA | ATTAACGACTGACATTGAGGTACGTAAGCATAAGTAGCGAAAAGGATTAGATACCCCTTGTAAGTTTATGCTGTAA | 827                                                |     |
| Pm_JX499144        | 549 | AAGCATTATTTCTA | ATTAACGACTGACATTGAGGTACGTAAGCATAAGTAGCGAAAAGGATTAGATACCCCTTGTAAGTTTATGCTGTAA | 635                                                |     |
| Ppdog_MIT726212    | 589 | AAGCATTATTTCTA | ATTAACGACTGACATTGAGGTACGTAAGCATAAGTAGCGAAAAGGATTAGATACCCCTTGTAAGTTTATGCTGTAA | 675                                                |     |
| Psquirrel          | 596 | AAGCATTATTTCTA | ATTAACGACTGACATTGAGGTACGTAAGCATAAGTAGCGAAAAGGATTAGATACCCCTTGTAAGTTTATGCTGTAA | 682                                                |     |
| Phare_v1           | 587 | AAGCATTATTTCTA | ATTAACGACTGACATTGAGGTACGTAAGCATAAGTAGCGAAAAGGATTAGATACCCCTTGTAAGTTTATGCTGTAA | 673                                                |     |
| Phare_v2           | 588 | AAGCATTATTTCTA | ATTAACGACTGACATTGAGGTACGTAAGCATAAGTAGCGAAAAGGATTAGATACCCCTTGTAAGTTTATGCTGTAA | 674                                                |     |

|                    |     |                                          |     |                                  |     |
|--------------------|-----|------------------------------------------|-----|----------------------------------|-----|
| Pj_NC_020331       | 761 | ACGATGAATGCTAGAGGTTGAGATATTTTATTTTGGTCTT | TAA | GTGAAGATTTTAAGCATTCCACCTGAGAAGTA | 837 |
| Pmac_MIT726214     | 678 | ACGATGAATGCTAGAGGTTGAGATATTTTATTTTGGTCTT | TAA | GTGAAGATTTTAAGCATTCCACCTGAGAAGTA | 753 |
| Pcan_CK1_MIT726215 | 685 | ACGATGAATGCTAGAGGTTGAGATATTTTATTTTGGTCTT | TAA | GTGAAGATTTTAAGCATTCCACCTGAGAAGTA | 763 |
| Pcan_CK2_MIT726216 | 686 | ACGATGAATGCTAGAGGTTGAGATATTTTATTTTGGTCTT | TAA | GTGAAGATTTTAAGCATTCCACCTGAGAAGTA | 764 |
| Pory_MIT726213     | 699 | ACGATGAATGCTAGAGGTTGAGATATTTTATTTTGGTCTT | TAA | GTGAAGATTTTAAGCATTCCACCTGAGAAGTA | 773 |
| Pc_JX499145        | 667 | ACGATGAATGCTAGAGGTTGAGATATTTTATTTTGGTCTT | TAA | GTGAAGATTTTAAGCATTCCACCTGAGAAGTA | 742 |
| Pw_MIT726211       | 828 | ACGATGAATGCTAGAGGTTGAGATATTTTATTTTGGTCTT | TAA | GTGAAGATTTTAAGCATTCCACCTGAGAAGTA | 904 |
| Pm_JX499144        | 636 | ACGATGAATGCTAGAGGTTGAGATATTTTATTTTGGTCTT | TAA | GTGAAGATTTTAAGCATTCCACCTGAGAAGTA | 712 |
| Ppdog_MIT726212    | 676 | ACGATGAATGCTAGAGGTTGAGATATTTTATTTTGGTCTT | TAA | GTGAAGATTTTAAGCATTCCACCTGAGAAGTA | 752 |
| Psquirrel          | 683 | ACGATGAATGCTAGAGGTTGAGATATTTTATTTTGGTCTT | TAA | GTGAAGATTTTAAGCATTCCACCTGAGAAGTA | 764 |
| Phare_v1           | 674 | ACGATGAATGCTAGAGGTTGAGATATTTTATTTTGGTCTT | TAA | GTGAAGATTTTAAGCATTCCACCTGAGAAGTA | 748 |
| Phare_v2           | 675 | ACGATGAATGCTAGAGGTTGAGATATTTTATTTTGGTCTT | TAA | GTGAAGATTTTAAGCATTCCACCTGAGAAGTA | 749 |

pAZ112-10F/R1 → pAZ112-13/R1 →

|                    |     |                            |                                                         |     |
|--------------------|-----|----------------------------|---------------------------------------------------------|-----|
| Pj_NC_020331       | 838 | CTGTCGCAAGGCTGAAACTCAAACAT | TAGACGGTACAGAGATCAGCAGTGAAGCATGTTGTTTAAATTCGATAACCCAGAT | 924 |
| Pmac_MIT726214     | 754 | CTGTCGCAAGGCTGAAACTCAAACAT | TAGACGGTACAGAGATCAGCAGTGAAGCATGTTGTTTAAATTCGATAACCCAGAT | 840 |
| Pcan_CK1_MIT726215 | 764 | CTGTCGCAAGGCTGAAACTCAAACAT | TAGACGGTACAGAGATCAGCAGTGAAGCATGTTGTTTAAATTCGATAACCCAGAT | 850 |
| Pcan_CK2_MIT726216 | 765 | CTGTCGCAAGGCTGAAACTCAAACAT | TAGACGGTACAGAGATCAGCAGTGAAGCATGTTGTTTAAATTCGATAACCCAGAT | 851 |
| Pory_MIT726213     | 774 | CTGTCGCAAGGCTGAAACTCAAACAT | TAGACGGTACAGAGATCAGCAGTGAAGCATGTTGTTTAAATTCGATAACCCAGAT | 860 |
| Pc_JX499145        | 743 | CTGTCGCAAGGCTGAAACTCAAACAT | TAGACGGTACAGAGATCAGCAGTGAAGCATGTTGTTTAAATTCGATAACCCAGAT | 829 |
| Pw_MIT726211       | 905 | CTGTCGCAAGGCTGAAACTCAAACAT | TAGACGGTACAGAGATCAGCAGTGAAGCATGTTGTTTAAATTCGATAACCCAGAT | 991 |
| Pm_JX499144        | 713 | CTGTCGCAAGGCTGAAACTCAAACAT | TAGACGGTACAGAGATCAGCAGTGAAGCATGTTGTTTAAATTCGATAACCCAGAT | 799 |
| Ppdog_MIT726212    | 753 | CTGTCGCAAGGCTGAAACTCAAACAT | TAGACGGTACAGAGATCAGCAGTGAAGCATGTTGTTTAAATTCGATAACCCAGAT | 839 |
| Psquirrel          | 765 | CTGTCGCAAGGCTGAAACTCAAACAT | TAGACGGTACAGAGATCAGCAGTGAAGCATGTTGTTTAAATTCGATAACCCAGAT | 851 |
| Phare_v1           | 749 | CTGTCGCAAGGCTGAAACTCAAACAT | TAGACGGTACAGAGATCAGCAGTGAAGCATGTTGTTTAAATTCGATAACCCAGAT | 835 |
| Phare_v2           | 750 | CTGTCGCAAGGCTGAAACTCAAACAT | TAGACGGTACAGAGATCAGCAGTGAAGCATGTTGTTTAAATTCGATAACCCAGAT | 836 |

**ms.r10** →

|                    |     |                |                |                |      |
|--------------------|-----|----------------|----------------|----------------|------|
| Pj_NC_020331       | 925 | CTTACCACCTCTTG | CTTACCACCTCTTG | CTTACCACCTCTTG | 938  |
| Pmac_MIT726214     | 841 | CTTACCACCTCTTG | CTTACCACCTCTTG | CTTACCACCTCTTG | 888  |
| Pcan_CK1_MIT726215 | 851 | CTTACCACCTCTTG | CTTACCACCTCTTG | CTTACCACCTCTTG | 880  |
| Pcan_CK2_MIT726216 | 852 | CTTACCACCTCTTG | CTTACCACCTCTTG | CTTACCACCTCTTG | 888  |
| Pory_MIT726213     | 861 | CTTACCACCTCTTG | CTTACCACCTCTTG | CTTACCACCTCTTG | 895  |
| Pc_JX499145        | 830 | CTTACCACCTCTTG | CTTACCACCTCTTG | CTTACCACCTCTTG | 916  |
| Pw_MIT726211       | 992 | CTTACCACCTCTTG | CTTACCACCTCTTG | CTTACCACCTCTTG | 1034 |
| Pm_JX499144        | 800 | CTTACCACCTCTTG | CTTACCACCTCTTG | CTTACCACCTCTTG | 824  |
| Ppdog_MIT726212    | 840 | CTTACCACCTCTTG | CTTACCACCTCTTG | CTTACCACCTCTTG | 871  |
| Psquirrel          | 852 | CTTACCACCTCTTG | CTTACCACCTCTTG | CTTACCACCTCTTG | 887  |
| Phare_v1           | 836 | CTTACCACCTCTTG | CTTACCACCTCTTG | CTTACCACCTCTTG | 866  |
| Phare_v2           | 837 | CTTACCACCTCTTG | CTTACCACCTCTTG | CTTACCACCTCTTG | 867  |

This portion (corresponding to nucleotides 939 to 1070 in Pj) is omitted to reduced the space

**SSU.r1** →

|                    |      |                                            |                      |                          |      |
|--------------------|------|--------------------------------------------|----------------------|--------------------------|------|
| Pj_NC_020331       | 1071 | TAGATGAATCAGGATGAAGACAAGTCTCATGACCCCTATG   | AGTGGGCTACAGACGTGCTG | CAAAATTTTCTACAATGGGATGCA | 1157 |
| Pmac_MIT726214     | 1071 | TAGATGAATCAGGATGAAGACAAGTCTCATGACCCCTATG   | AGTGGGCTACAGACGTGCTG | CAAAATTTTCTACAATGGGATGCA | 1187 |
| Pcan_CK1_MIT726215 | 1106 | AAGAGTAATTTAGGATTAAGACAAGTCTCATGACCCCTATG  | AGTGGGCTACAGACGTGCTG | CAAAATTTTCTACAATGGGATGCA | 1102 |
| Pcan_CK2_MIT726216 | 1104 | AAGAGTAATTTAGGATTAAGACAAGTCTCATGACCCCTATG  | AGTGGGCTACAGACGTGCTG | CAAAATTTTCTACAATGGGATGCA | 1134 |
| Pory_MIT726213     | 1042 | AAGAGTAATTTAGGATTAAGACAAGTCTCATGACCCCTATG  | AGTGGGCTACAGACGTGCTG | CAAAATTTTCTACAATGGGATGCA | 1128 |
| Pc_JX499145        | 1295 | AGAAATTAATTTAGGCTGAAGACAAGTCTCATGACCCCTATG | AGTGGGCTACAGACGTGCTG | CAAAATTTTCTACAATGGGATGCA | 1381 |
| Pw_MIT726211       | 1355 | AGAAATTAATTTAGGCTGAAGACAAGTCTCATGACCCCTATG | AGTGGGCTACAGACGTGCTG | CAAAATTTTCTACAATGGGATGCA | 1441 |
| Pm_JX499144        | 947  | AGAAATTAATTTAGGATGAAGACAAGTCTCATGACCCCTATG | AGTGGGCTACAGACGTGCTG | CAAAATTTTCTACAATGGGATGCA | 1033 |
| Ppdog_MIT726212    | 995  | AGAAATTAATTTAGGATGAAGACAAGTCTCATGACCCCTATG | AGTGGGCTACAGACGTGCTG | CAAAATTTTCTACAATGGGATGCA | 1081 |
| Psquirrel          | 1039 | AAGAGTAATTTAGGATGAAGACAAGTCTCATGACCCCTATG  | AGTGGGCTACAGACGTGCTG | CAAAATTTTCTACAATGGGATGCA | 1125 |
| Phare_v1           | 1008 | AAGATGAATAGGATGAAGACAAGTCTCATGACCCCTATG    | AGTGGGCTACAGACGTGCTG | CAAAATTTTCTACAATGGGATGCA | 1094 |
| Phare_v2           | 1011 | AAGATGAATAGGATGAAGACAAGTCTCATGACCCCTATG    | AGTGGGCTACAGACGTGCTG | CAAAATTTTCTACAATGGGATGCA | 1097 |

pAZ112-14/R1 ← pAZ112-10R/R1 ←

|                    |      |     |                       |            |                  |                                 |      |
|--------------------|------|-----|-----------------------|------------|------------------|---------------------------------|------|
| Pj_NC_020331       | 1158 | TGA | TGGAAGTCTGAGCTAATCCCT | AAAAGATTTT | TAGTCTGGATAAGTGC | CTGGAACCTGCTCTTTGAAGTTGGAATTGCT | 1241 |
| Pmac_MIT726214     | 1189 | TGA | TGGAAGTCTGAGCTAATCCCT | AAAAGATTTT | TAGTCTGGATAAGTGC | CTGGAACCTGCTCTTTGAAGTTGGAATTGCT | 1270 |
| Pcan_CK1_MIT726215 | 1103 | TGA | TGGAAGTCTGAGCTAATCCCT | AAAAGATTTT | TAGTCTGGATAAGTGC | CTGGAACCTGCTCTTTGAAGTTGGAATTGCT | 1186 |
| Pcan_CK2_MIT726216 | 1135 | TGA | TGGAAGTCTGAGCTAATCCCT | AAAAGATTTT | TAGTCTGGATAAGTGC | CTGGAACCTGCTCTTTGAAGTTGGAATTGCT | 1218 |
| Pory_MIT726213     | 1129 | TGA | TGGAAGTCTGAGCTAATCCCT | AAAAGATTTT | TAGTCTGGATAAGTGC | CTGGAACCTGCTCTTTGAAGTTGGAATTGCT | 1211 |
| Pc_JX499145        | 1382 | TGA | TGGAAGTCTGAGCTAATCCCT | AAAAGATTTT | TAGTCTGGATAAGTGC | CTGGAACCTGCTCTTTGAAGTTGGAATTGCT | 1464 |
| Pw_MIT726211       | 1442 | TGA | TGGAAGTCTGAGCTAATCCCT | AAAAGATTTT | TAGTCTGGATAAGTGC | CTGGAACCTGCTCTTTGAAGTTGGAATTGCT | 1526 |
| Pm_JX499144        | 1034 | TGA | TGGAAGTCTGAGCTAATCCCT | AAAAGATTTT | TAGTCTGGATAAGTGC | CTGGAACCTGCTCTTTGAAGTTGGAATTGCT | 1116 |
| Ppdog_MIT726212    | 1082 | TGA | TGGAAGTCTGAGCTAATCCCT | AAAAGATTTT | TAGTCTGGATAAGTGC | CTGGAACCTGCTCTTTGAAGTTGGAATTGCT | 1167 |
| Psquirrel          | 1126 | TGA | TGGAAGTCTGAGCTAATCCCT | AAAAGATTTT | TAGTCTGGATAAGTGC | CTGGAACCTGCTCTTTGAAGTTGGAATTGCT | 1210 |
| Phare_v1           | 1095 | TGA | TGGAAGTCTGAGCTAATCCCT | AAAAGATTTT | TAGTCTGGATAAGTGC | CTGGAACCTGCTCTTTGAAGTTGGAATTGCT | 1177 |
| Phare_v2           | 1098 | TGA | TGGAAGTCTGAGCTAATCCCT | AAAAGATTTT | TAGTCTGGATAAGTGC | CTGGAACCTGCTCTTTGAAGTTGGAATTGCT | 1180 |

pAZ112-10R/R1 ←

|                    |      |                    |                  |               |                            |             |      |
|--------------------|------|--------------------|------------------|---------------|----------------------------|-------------|------|
| Pj_NC_020331       | 1242 | AGTAATCGTCTATCAGCA | GAGACGGTGAATCTTT | TATCTGTGATGTA | CTAAGTCTGCTCAAGCGCGGAATTTT | TAAAGAAATTT | 1327 |
| Pmac_MIT726214     | 1271 | AGTAATCGTCTATCAGCA | GAGACGGTGAATCTTT | TATCTGTGATGTA | CTAAGTCTGCTCAAGCGCGGAATTTT | TAAAGAAATTT | 1356 |
| Pcan_CK1_MIT726215 | 1187 | AGTAATCGTCTATCAGCA | GAGACGGTGAATCTTT | TATCTGTGATGTA | CTAAGTCTGCTCAAGCGCGGAATTTT | TAAAGAAATTT | 1272 |
| Pcan_CK2_MIT726216 | 1219 | AGTAATCGTCTATCAGCA | GAGACGGTGAATCTTT | TATCTGTGATGTA | CTAAGTCTGCTCAAGCGCGGAATTTT | TAAAGAAATTT | 1304 |
| Pory_MIT726213     | 1212 | AGTAATCGTCTATCAGCA | GAGACGGTGAATCTTT | TATCTGTGATGTA | CTAAGTCTGCTCAAGCGCGGAATTTT | TAAAGAAATTT | 1297 |
| Pc_JX499145        | 1465 | AGTAATCGTCTATCAGCA | GAGACGGTGAATCTTT | TATCTGTGATGTA | CTAAGTCTGCTCAAGCGCGGAATTTT | TAAAGAAATTT | 1550 |
| Pw_MIT726211       | 1527 | AGTAATCGTCTATCAGCA | GAGACGGTGAATCTTT | TATCTGTGATGTA | CTAAGTCTGCTCAAGCGCGGAATTTT | TAAAGAAATTT | 1613 |
| Pm_JX499144        | 1117 | AGTAATCGTCTATCAGCA | GAGACGGTGAATCTTT | TATCTGTGATGTA | CTAAGTCTGCTCAAGCGCGGAATTTT | TAAAGAAATTT | 1202 |
| Ppdog_MIT726212    | 1168 | AGTAATCGTCTATCAGCA | GAGACGGTGAATCTTT | TATCTGTGATGTA | CTAAGTCTGCTCAAGCGCGGAATTTT | TAAAGAAATTT | 1253 |
| Psquirrel          | 1211 | AGTAATCGTCTATCAGCA | GAGACGGTGAATCTTT | TATCTGTGATGTA | CTAAGTCTGCTCAAGCGCGGAATTTT | TAAAGAAATTT | 1296 |
| Phare_v1           | 1178 | AGTAATCGTCTATCAGCA | GAGACGGTGAATCTTT | TATCTGTGATGTA | CTAAGTCTGCTCAAGCGCGGAATTTT | TAAAGAAATTT | 1263 |
| Phare_v2           | 1181 | AGTAATCGTCTATCAGCA | GAGACGGTGAATCTTT | TATCTGTGATGTA | CTAAGTCTGCTCAAGCGCGGAATTTT | TAAAGAAATTT | 1266 |

← **rns.f8**

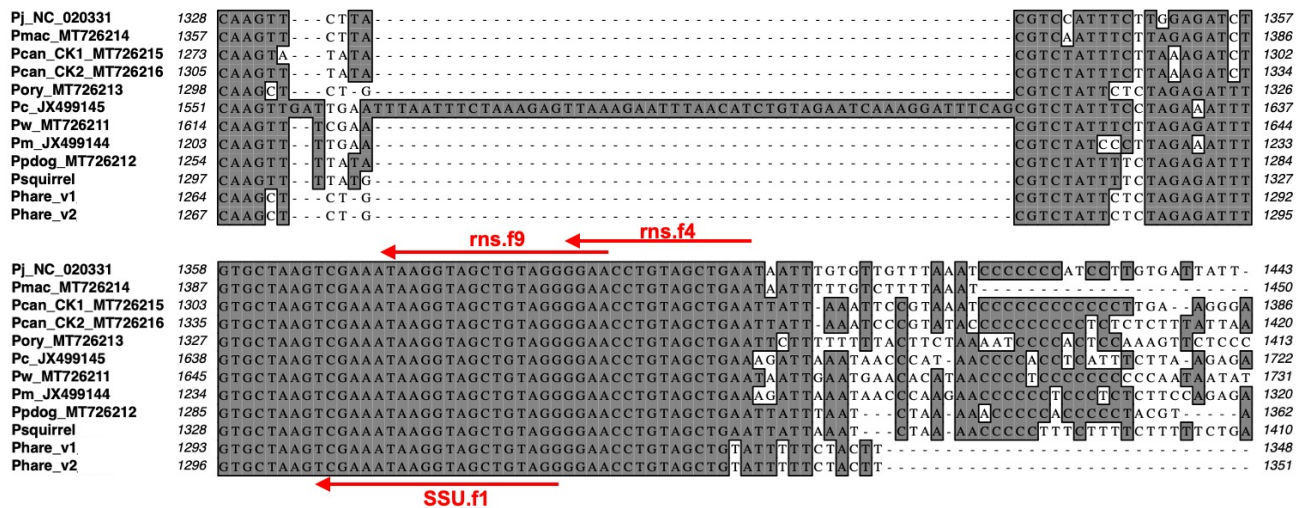

**Supplemental Figure S2. Alignment of mitochondrial small-subunit (mtSSU) rRNA sequences of different *Pneumocystis* species and strains.** Highly conserved sequences are highlighted in dark shadow. Dashes represents gaps introduced to optimize alignment. New primers designed in this study are indicated in red. The locations of the previously used universal *Pneumocystis* primers [38] were indicated in blue. The sequences of primers pAZ112-10F/R1 and pAZ112-13/R1 are identical to the respective regions in *P. jirovecii* (Pj), primer pAZ112-10R/R1 sequence is identical to the respective regions in *P. carinii* (Pc), and primer pAZ112-14/R1 contains a degenerate nucleotide (Y) at two positions (5'-TTCAAAGAAAYCGAGTTYCAG-3'), which were omitted in the reference [37]. GenBank accession numbers are indicated after the names of *Pneumocystis* species/strains abbreviated as follows: Pj, *P. jirovecii*; Pmac, *P. macacae*; Pcan\_CK1, *P. canis* strain CK1; Pcan\_CK2, *P. canis* strain CK2; Pory, *P. oryctolagi*; Pc, *P. carinii*; Pw, *P. wakefieldiae*; Pm, *P. murina*, Ppdog, *Pneumocystis ludoviciana* from prairie dogs (Table S6); Psquirrel, *Pneumocystis* from squirrels; Phare\_v1, *P. sp. 'townsendii'* variant 1 from hares; Phare\_v2, *P. sp. 'townsendii'* variant 2 from hares. GenBank accession numbers for the last 3 sequences are PP484879, PP477339 and PP477340. Numbers on the two ends of each sequence correspond to the nucleotide positions of the full-length mtLSU gene in GenBank.
