# Supplementary material for: Development of Highly Efficient Universal Pneumocystis Primers and Their Application in Investigating the Prevalence and Genetic Diversity of Pneumocystis in Wild Hares and Rabbits
Source: MDPI journal article supplement (doi:10.3390/jof10050355), 2024-05-15
Supplement: s1 [file s1]

Supplemental Table S1. Metadata for hares and rabbits used in this study.

| Animal number | Date Carcass Collected | Date Sample Collected | Animal Species          | Sex                | mtSSU PCR | mtLSU PCR | Combined    |           | dhps PCR Results | ITS1-5.8S-ITS2 PCR Results |
|---------------|------------------------|-----------------------|-------------------------|--------------------|-----------|-----------|-------------|-----------|------------------|----------------------------|
|               |                        |                       |                         | (Male=1, Female=2) | Results   | Results   | PCR Results | Genotypes |                  |                            |
| HR20-001      | ?-Dec-2019             | 20-Jan-2020           | <i>Lepus townsendii</i> | 2                  | +         | +         | +           | v1        | —                | —                          |
| HR20-002      | 30-Dec-2019            | 20-Jan-2020           | <i>Lepus townsendii</i> | 1                  | +         | +         | +           | v1        | —                | +                          |
| HR20-003      | ?-Dec-2019             | 20-Jan-2020           | <i>Lepus townsendii</i> | 2                  | +         | +         | +           | v1        | —                | +                          |
| HR20-004      | 28-Dec-2019            | 22-Jan-2020           | <i>Lepus townsendii</i> | 1                  | +         | +         | +           | v1        | +                | +                          |
| HR20-005      | ?-Dec-2019             | 22-Jan-2020           | <i>Lepus townsendii</i> | 2                  | +         | +         | +           | v1        | —                | —                          |
| HR20-006      | 15-Dec-2019            | 22-Jan-2020           | <i>Lepus townsendii</i> | 1                  | +         | +         | +           | v1        | +                | +                          |
| HR20-007      | 29-Dec-2019            | 23-Jan-2020           | <i>Lepus townsendii</i> | 1                  | +         | +         | +           | v1        | —                | —                          |
| HR20-008      | 10-Dec-2019            | 23-Jan-2020           | <i>Lepus townsendii</i> | 1                  | +         | +         | +           | v1        | —                | —                          |
| HR20-009      | 20-Dec-2019            | 23-Jan-2020           | <i>Lepus townsendii</i> | 1                  | +         | +         | +           | v1        | +                | +                          |
| HR20-010      | Unknown                | 24-Jan-2020           | <i>Lepus townsendii</i> | 1                  | +         | +         | +           | v1        | —                | —                          |
| HR20-011      | 16-Dec-2019            | 24-Jan-2020           | <i>Lepus townsendii</i> | 1                  | +         | +         | +           | v1        | +                | —                          |
| HR20-012      | 19-Dec-2019            | 24-Jan-2020           | <i>Lepus townsendii</i> | 2                  | —         | —         | —           | n/a       | —                | —                          |
| HR20-013      | 30-Dec-2019            | 24-Jan-2020           | <i>Lepus townsendii</i> | 1                  | +         | +         | +           | v3        | —                | +                          |
| HR20-014      | ?-Dec-2019             | 24-Jan-2020           | <i>Lepus townsendii</i> | 1                  | +         | +         | +           | v1        | +                | +                          |
| HR20-015      | Unknown                | 7-Jan-2020            | <i>Lepus townsendii</i> | 1                  | +         | +         | +           | v1        | +                | +                          |
| HR20-016      | 11-Dec-2019            | 27-Jan-2020           | <i>Lepus townsendii</i> | 2                  | —         | —         | —           | n/a       | —                | —                          |
| HR20-017      | 24-Jan-2020            | 27-Jan-2020           | <i>Lepus townsendii</i> | 2                  | +         | +         | +           | v1        | —                | +                          |
| HR20-018      | ?-?-2020               | 27-Jan-2020           | <i>Lepus townsendii</i> | 2                  | +         | +         | +           | v1        | +                | +                          |
| HR20-019      | 21-Jan-2020            | 28-Jan-2020           | <i>Lepus townsendii</i> | 2                  | +         | +         | +           | v1        | —                | +                          |
| HR20-020      | 22-Jan-2020            | 28-Jan-2020           | <i>Lepus townsendii</i> | 2                  | +         | +         | +           | v1        | +                | +                          |
| HR20-021      | 19-Jan-2020            | 28-Jan-2020           | <i>Lepus townsendii</i> | 2                  | —         | —         | —           | n/a       | —                | —                          |
| HR20-022      | 25-Jan-2020            | 31-Jan-2020           | <i>Lepus townsendii</i> | 1                  | +         | +         | +           | v1        | —                | —                          |
| HR20-023      | 28-Jan-2020            | 31-Jan-2020           | <i>Lepus townsendii</i> | 1                  | +         | +         | +           | v1        | —                | —                          |
| HR20-024      | 25-Jan-2020            | 3-Feb-2020            | <i>Lepus townsendii</i> | 2                  | +         | +         | +           | v1        | +                | +                          |
| HR20-025      | 25-Jan-2020            | 3-Feb-2020            | <i>Lepus townsendii</i> | 1                  | +         | +         | +           | v1        | +                | +                          |
| HR20-028      | 28-Jan-2020            | 4-Feb-2020            | <i>Lepus townsendii</i> | 2                  | +         | +         | +           | v1        | +                | +                          |
| HR20-029      | 3-Feb-2020             | 12-Feb-2020           | <i>Lepus townsendii</i> | 2                  | +         | +         | +           | v1        | +                | +                          |
| HR20-030      | 30-Jan-2020            | 12-Feb-2020           | <i>Lepus townsendii</i> | 1                  | +         | +         | +           | v1        | +                | +                          |
| HR20-031      | 31-Jan-2020            | 12-Feb-2020           | <i>Lepus townsendii</i> | 2                  | +         | +         | +           | v1        | —                | —                          |
| HR20-032      | 19-Feb-2020            | 26-Feb-2020           | <i>Lepus townsendii</i> | 1                  | +         | +         | +           | v1        | +                | —                          |
| HR20-033      | 21-Feb-2020            | 26-Feb-2020           | <i>Lepus townsendii</i> | 1                  | +         | +         | +           | v1        | +                | +                          |
| HR20-034      | 14-Feb-2020            | 26-Feb-2020           | <i>Lepus townsendii</i> | 1                  | +         | +         | +           | v1        | +                | +                          |
| HR20-036      | 19-Feb-2020            | 27-Feb-2020           | <i>Lepus townsendii</i> | 2                  | +         | +         | +           | v1        | —                | +                          |
| HR20-037      | 29-Feb-2020            | 4-Mar-2020            | <i>Lepus townsendii</i> | 1                  | +         | +         | +           | v1        | —                | —                          |
| HR20-038      | 4-Mar-2020             | 4-Mar-2020            | <i>Lepus townsendii</i> | 1                  | —         | —         | —           | n/a       | —                | +                          |
| HR20-039      | 25-Feb-2020            | 4-Mar-2020            | <i>Lepus townsendii</i> | 2                  | +         | +         | +           | v1        | +                | +                          |
| HR20-041      | 5-Mar-2020             | 12-Mar-2020           | <i>Lepus townsendii</i> | 1                  | +         | +         | +           | v1        | —                | +                          |
| HR20-043      | 3-Mar-2020             | 12-Mar-2020           | <i>Lepus townsendii</i> | Unknown            | +         | +         | +           | v1        | +                | +                          |
| HR20-044      | 1-Mar-2020             | 13-Mar-2020           | <i>Lepus townsendii</i> | 1                  | —         | —         | —           | n/a       | —                | +                          |
| HR20-045      | 3-Mar-2020             | 13-Mar-2020           | <i>Lepus townsendii</i> | 2                  | +         | +         | +           | v1        | —                | +                          |
| HR20-046      | 11-Mar-2020            | 17-Mar-2020           | <i>Lepus townsendii</i> | 2                  | +         | +         | +           | v1        | —                | +                          |
| HR20-047      | 11-Mar-2020            | 17-Mar-2020           | <i>Lepus townsendii</i> | 1                  | +         | +         | +           | v1        | +                | +                          |
| HR20-048      | 6-Mar-2020             | 13-Mar-2020           | <i>Lepus townsendii</i> | Unknown            | +         | —         | +           | v1        | —                | —                          |
| HR20-049      | ?-Mar-2020             | 17-Mar-2020           | <i>Lepus townsendii</i> | 2                  | +         | +         | +           | v1        | —                | +                          |
| HR20-050      | 9-Mar-2020             | 19-Mar-2020           | <i>Lepus townsendii</i> | 2                  | —         | —         | —           | n/a       | —                | —                          |
| HR20-051      | 9-Mar-2020             | 19-Mar-2020           | <i>Lepus townsendii</i> | 2                  | +         | +         | +           | v1        | —                | —                          |
| HR20-052      | 9-Apr-2020             | 23-Jun-2020           | <i>Lepus townsendii</i> | 2                  | +         | +         | +           | v1        | —                | —                          |
| HR20-053      | 7-Apr-2020             | 23-Jun-2020           | <i>Lepus townsendii</i> | 2                  | +         | +         | +           | v1        | —                | —                          |
| HR20-055      | 3-Apr-2020             | 25-Jun-2020           | <i>Lepus townsendii</i> | 1                  | +         | —         | +           | v1        | —                | —                          |
| HR20-056      | 30-Mar-2020            | 26-Jun-2020           | <i>Lepus townsendii</i> | 2                  | +         | +         | +           | v1        | —                | —                          |
| HR20-057      | 27-Mar-2020            | 26-Jun-2020           | <i>Lepus townsendii</i> | 2                  | +         | +         | +           | v1        | —                | —                          |
| HR20-058      | Unknown                | 13-Jul-2020           | <i>Lepus townsendii</i> | 2                  | +         | +         | +           | v1        | —                | —                          |
| HR20-059      | 30-Mar-2020            | 13-Jul-2020           | <i>Lepus townsendii</i> | 1                  | —         | —         | —           | n/a       | —                | —                          |
| HR20-060      | 18-Mar-2020            | 13-Jul-2020           | <i>Lepus townsendii</i> | 2                  | +         | +         | +           | v1        | +                | +                          |
| HR20-061      | 21-Mar-2020            | 14-Jul-2020           | <i>Lepus townsendii</i> | 1                  | +         | +         | +           | v1        | +                | —                          |
| HR20-062      | 22-Mar-2020            | 14-Jul-2020           | <i>Lepus townsendii</i> | 1                  | +         | +         | +           | v1        | +                | —                          |
| HR20-064      | Unknown                | 15-Jul-2020           | <i>Lepus townsendii</i> | 1                  | +         | +         | +           | v1        | —                | —                          |
| HR20-065      | 9-Apr-2020             | 15-Jul-2020           | <i>Lepus townsendii</i> | 1                  | +         | +         | +           | v1        | +                | +                          |
| HR20-066      | Unknown                | 17-Jul-2020           | <i>Lepus townsendii</i> | 1                  | +         | —         | +           | v1        | —                | +                          |
| HR20-067      | 25-Mar-2020            | 17-Jul-2020           | <i>Lepus townsendii</i> | 2                  | —         | —         | —           | n/a       | —                | —                          |
| HR20-068      | 12-May-2020            | 27-Jul-2020           | <i>Lepus townsendii</i> | 2                  | +         | +         | +           | v1        | —                | +                          |
| HR20-069      | 18-Mar-2020            | 27-Jul-2020           | <i>Lepus townsendii</i> | 1                  | +         | +         | +           | v1        | —                | +                          |
| HR20-070      | 29-Mar-2020            | 28-Jul-2020           | <i>Lepus townsendii</i> | 1                  | —         | —         | —           | v1        | —                | +                          |
| HR20-071      | ?-?-2020               | 28-Jul-2020           | <i>Lepus townsendii</i> | 2                  | +         | +         | +           | v1        | —                | +                          |
| HR20-072      | 6-Jun-2020             | 30-Jul-2020           | <i>Lepus townsendii</i> | 2                  | +         | +         | +           | v2        | +                | —                          |
| HR20-073      | 10-Jun-2020            | 30-Jul-2020           | <i>Lepus townsendii</i> | 2                  | +         | +         | +           | v1        | —                | +                          |
| HR20-074      | 25-May-2020            | 30-Jul-2020           | <i>Lepus townsendii</i> | 1                  | +         | +         | +           | v1        | +                | +                          |
| HR20-075      | 8-Jun-2020             | 31-Jul-2020           | <i>Lepus townsendii</i> | 2                  | +         | +         | +           | v1        | —                | +                          |

|          |             |             |                              |         |   |   |   |     |   |   |
|----------|-------------|-------------|------------------------------|---------|---|---|---|-----|---|---|
| HR20-076 | 2-May-2020  | 31-Jul-2020 | <i>Lepus townsendii</i>      | 2       | + | - | + | v4  | - | + |
| HR20-077 | 5-May-2020  | 4-Aug-2020  | <i>Lepus townsendii</i>      | 1       | + | + | + | v2  | + | + |
| HR20-078 | 23-Apr-2020 | 4-Aug-2020  | <i>Lepus townsendii</i>      | 1       | - | - | - | n/a | - | - |
| HR20-079 | 19-May-2020 | 7-Aug-2020  | <i>Lepus townsendii</i>      | 2       | - | - | - | n/a | - | + |
| HR20-080 | 7-May-2020  | 7-Aug-2020  | <i>Lepus townsendii</i>      | 2       | + | + | + | v1  | - | + |
| HR20-081 | 15-Jul-2020 | 20-Aug-2020 | <i>Lepus townsendii</i>      | 2       | + | + | + | v1  | - | - |
| HR20-082 | 21-Jul-2020 | 20-Aug-2020 | <i>Lepus townsendii</i>      | 1       | - | - | - | n/a | - | - |
| HR20-083 | 20-Jul-2020 | 20-Aug-2020 | <i>Lepus townsendii</i>      | 2       | - | - | - | n/a | - | - |
| HR20-084 | 14-Jul-2020 | 21-Aug-2020 | <i>Lepus townsendii</i>      | 2       | + | - | + | v5  | - | - |
| HR20-085 | 26-May-2020 | 21-Aug-2020 | <i>Lepus townsendii</i>      | 1       | + | + | + | v1  | - | - |
| HR20-086 | 18-Jun-2020 | 21-Aug-2020 | <i>Lepus townsendii</i>      | 2       | - | - | - | n/a | - | - |
| HR20-087 | 25-Jun-2020 | 31-Aug-2020 | <i>Lepus townsendii</i>      | 2       | - | + | + | v1  | - | + |
| HR20-088 | 17-Jun-2020 | 1-Sep-2020  | <i>Lepus townsendii</i>      | 1       | + | + | + | v1  | - | + |
| HR20-089 | 8-Jun-2020  | 1-Sep-2020  | <i>Lepus townsendii</i>      | 1       | + | + | + | v2  | - | + |
| HR20-090 | ?-?-2020    | 1-Sep-2020  | <i>Lepus townsendii</i>      | 1       | + | + | + | v2  | + | + |
| HR20-091 | 11-May-2020 | 3-Sep-2020  | <i>Lepus townsendii</i>      | 1       | - | + | + | v1  | - | - |
| HR20-092 | 11-May-2020 | 3-Sep-2020  | <i>Lepus townsendii</i>      | 1       | - | - | - | n/a | - | + |
| HR20-093 | 7-May-2020  | 3-Sep-2020  | <i>Lepus townsendii</i>      | 2       | - | - | - | n/a | - | - |
| HR20-094 | 20-Apr-2020 | 4-Sep-2020  | <i>Lepus townsendii</i>      | 1       | - | - | - | n/a | - | - |
| HR20-095 | 25-Apr-2020 | 4-Sep-2020  | <i>Lepus townsendii</i>      | 2       | + | + | + | v1  | + | + |
| HR20-096 | 11-May-2020 | 8-Sep-2020  | <i>Lepus townsendii</i>      | 2       | - | - | - | n/a | - | - |
| HR20-097 | 29-Apr-2020 | 8-Sep-2020  | <i>Lepus townsendii</i>      | 1       | + | + | + | v1  | - | - |
| HR20-098 | 30-Apr-2020 | 8-Sep-2020  | <i>Lepus townsendii</i>      | 1       | - | - | - | n/a | - | - |
| HR20-099 | 27-Apr-2020 | 11-Sep-2020 | <i>Lepus townsendii</i>      | 1       | + | + | + | v1  | - | + |
| HR20-100 | 21-May-2020 | 14-Sep-2020 | <i>Lepus townsendii</i>      | 1       | + | + | + | v1  | - | + |
| HR20-101 | 8-Jun-2020  | 14-Sep-2020 | <i>Lepus townsendii</i>      | 2       | + | + | + | v1  | - | - |
| HR20-102 | 21-Jun-2020 | 14-Sep-2020 | <i>Lepus townsendii</i>      | 2       | + | + | + | v1  | - | - |
| HR20-103 | 10-Jun-2020 | 15-Sep-2020 | <i>Lepus townsendii</i>      | 1       | - | + | + | v1  | - | - |
| HR20-104 | 30-Jun-2020 | 15-Sep-2020 | <i>Lepus townsendii</i>      | 1       | + | - | + | v1  | - | - |
| HR20-105 | 4-Jun-2020  | 17-Sep-2020 | <i>Lepus townsendii</i>      | 1       | + | + | + | v1  | - | + |
| HR20-106 | 1-Jul-2020  | 17-Sep-2020 | <i>Lepus townsendii</i>      | 1       | + | + | + | v1  | - | + |
| HR20-107 | 27-May-2020 | 17-Sep-2020 | <i>Lepus townsendii</i>      | 2       | + | + | + | v1  | - | + |
| HR20-108 | 22-Apr-2020 | 18-Sep-2020 | <i>Lepus townsendii</i>      | 1       | + | + | + | v1  | + | - |
| HR20-110 | 11-Jun-2020 | 21-Sep-2020 | <i>Lepus townsendii</i>      | 1       | + | + | + | v1  | - | - |
| HR20-113 | 11-Jun-2020 | 21-Sep-2020 | <i>Lepus townsendii</i>      | 2       | - | - | - | n/a | - | + |
| HR20-114 | 8-Jun-2020  | 21-Sep-2020 | <i>Lepus townsendii</i>      | 1       | + | + | + | v1  | - | + |
| HR20-115 | 21-Apr-2020 | 21-Sep-2020 | <i>Lepus townsendii</i>      | Unknown | + | + | + | v1  | - | - |
| HR20-117 | 23-Jun-2020 | 22-Sep-2020 | <i>Lepus townsendii</i>      | 1       | + | + | + | v1  | - | - |
| HR20-118 | Unknown     | 22-Sep-2020 | <i>Lepus townsendii</i>      | 1       | + | - | + | v1  | - | - |
| HR20-122 | 29-Apr-2020 | 24-Sep-2020 | <i>Lepus townsendii</i>      | 2       | + | + | + | v1  | - | - |
| HR20-123 | 23-Jun-2020 | 24-Sep-2020 | <i>Lepus townsendii</i>      | 1       | + | + | + | v3  | - | + |
| HR20-126 | 15-May-2020 | 24-Sep-2020 | <i>Lepus townsendii</i>      | 2       | + | + | + | v1  | + | + |
| HR20-127 | 23-Jun-2020 | 24-Sep-2020 | <i>Lepus townsendii</i>      | 1       | + | + | + | v2  | - | - |
| HR20-128 | 9-Jul-2020  | 25-Sep-2020 | <i>Lepus townsendii</i>      | 2       | + | + | + | v1  | - | - |
| HR20-129 | 18-Jun-2020 | 25-Sep-2020 | <i>Lepus townsendii</i>      | 1       | + | + | + | v1  | - | - |
| HR20-130 | 9-Jul-2020  | 25-Sep-2020 | <i>Lepus townsendii</i>      | 2       | - | - | - | n/a | - | - |
| HR20-131 | 22-Jun-2020 | 25-Sep-2020 | <i>Lepus townsendii</i>      | 2       | - | + | + | v1  | - | - |
| HR20-132 | 3-Jun-2020  | 25-Sep-2020 | <i>Lepus townsendii</i>      | 1       | - | - | - | n/a | - | - |
| HR20-133 | 9-Jul-2020  | 5-Oct-2020  | <i>Lepus townsendii</i>      | 1       | - | - | - | n/a | - | - |
| HR20-135 | 6-Jul-2020  | 5-Oct-2020  | <i>Lepus townsendii</i>      | 1       | + | + | + | v1  | - | - |
| HR20-137 | 7-Jul-2020  | 5-Oct-2020  | <i>Lepus townsendii</i>      | 2       | - | - | - | n/a | - | - |
| HR20-140 | 2-Jul-2020  | 6-Oct-2020  | <i>Lepus townsendii</i>      | 2       | + | + | + | v1  | - | + |
| HR20-142 | 9-Jul-2020  | 6-Oct-2020  | <i>Lepus townsendii</i>      | 1       | - | - | - | n/a | - | - |
| HR20-143 | 23-Apr-2020 | 6-Oct-2020  | <i>Lepus townsendii</i>      | 2       | + | + | + | v1  | + | - |
| HR20-145 | 23-Apr-2020 | 8-Oct-2020  | <i>Lepus townsendii</i>      | 1       | + | + | + | v1  | - | + |
| HR20-146 | 16-Apr-2020 | 8-Oct-2020  | <i>Lepus townsendii</i>      | 2       | + | + | + | v1  | - | + |
| HR20-147 | 14-Apr-2020 | 8-Oct-2020  | <i>Lepus townsendii</i>      | 1       | + | + | + | v1  | - | - |
| HR20-148 | 20-Apr-2020 | 8-Oct-2020  | <i>Lepus townsendii</i>      | 1       | + | + | + | v1  | - | + |
| HR20-149 | 21-Apr-2020 | 8-Oct-2020  | <i>Lepus townsendii</i>      | 1       | + | + | + | v1  | - | - |
| HR20-150 | 22-Apr-2020 | 8-Oct-2020  | <i>Lepus townsendii</i>      | 1       | + | + | + | v2  | - | - |
| HR20-151 | 28-Apr-2020 | 9-Oct-2020  | <i>Lepus townsendii</i>      | 1       | + | + | + | v1  | - | + |
| HR20-154 | 28-Apr-2020 | 9-Oct-2020  | <i>Lepus townsendii</i>      | 1       | + | + | + | v1  | + | + |
| HR20-035 | 11-Feb-2020 | 27-Feb-2020 | <i>Oryctolagus cuniculus</i> | 2       | - | - | - | n/a | - | - |
| HR20-042 | 4-Mar-2020  | 12-Mar-2020 | <i>Oryctolagus cuniculus</i> | 2       | + | + | + | v1  | - | - |
| HR20-054 | 7-Apr-2020  | 25-Jun-2020 | <i>Oryctolagus cuniculus</i> | 1       | - | - | - | n/a | - | - |
| HR20-109 | 11-Jun-2020 | 21-Sep-2020 | <i>Oryctolagus cuniculus</i> | 1       | - | - | - | n/a | - | - |
| HR20-134 | 7-Jul-2020  | 5-Oct-2020  | <i>Oryctolagus cuniculus</i> | 2       | + | + | + | v2  | - | - |
| HR20-139 | 7-Jul-2020  | 6-Oct-2020  | <i>Oryctolagus cuniculus</i> | 2       | - | - | - | n/a | - | - |
| HR20-152 | 21-Jul-2020 | 9-Oct-2020  | <i>Oryctolagus cuniculus</i> | 2       | - | - | - | n/a | - | - |
| HR20-153 | 24-May-2020 | 9-Oct-2020  | <i>Oryctolagus cuniculus</i> | 1       | - | - | - | n/a | - | - |

n/a, not applicable; ?, unidentified dates or months; mtSSU, mitochondrial small-subunit rRNA gene; mtLSU, mitochondrial large-subunit rRNA gene; dhps, dihydropteroate synthase; ITS1-5.8s-ITS2, nuclear internal transcribed spacer 1, 5.8S rRNA and internal transcribed spacer 2.
