# Supplementary material for: Development of Highly Efficient Universal Pneumocystis Primers and Their Application in Investigating the Prevalence and Genetic Diversity of Pneumocystis in Wild Hares and Rabbits
Source: MDPI journal article supplement (doi:10.3390/jof10050355), 2024-05-15
Supplement: s1 [file s1]

|              |      |                                                                                         |      |
|--------------|------|-----------------------------------------------------------------------------------------|------|
| Phare_v1     | 1    | TATGAATCAGAGCCTATGTATTTTGAATAATCAGCCAATATTTATAATGCTGTATGTAAGGTATATAGTATTTTTCGTTTAAATT   | 85   |
| Phare_v2     | 1    | TATGAATCAGAGCCTATGTATTTTGAATAATCAGCCAATATTTATAATGCTGTATGTAAGGTATATAGTATTTTTCATTTTAAATT  | 85   |
| P.oryctolagi | 1    | TATGAATCGAGCCTATGTATTTTGAATAATCAACCACTATTTTATAATGCTGTATGTAAGGTATATAGTATTTTTCATTTTAAATT  | 85   |
| Phare_v1     | 86   | GATAATTTTGTATTTTAAAGGTTGAGACTTCTTTAAATCCTCAACAGCTTCTTATTGAATTACAAACAATTGAAAAGGAGCT      | 170  |
| Phare_v2     | 86   | GACAAATTTTGTATTTTAAAGGTAAGAGACTTCTTTAAATCCTCAACAGCTTCTTATTGAATTACAAACAATTGAAAAGGAGCT    | 170  |
| P.oryctolagi | 86   | GATAATTTTATTTATTTTAAAGGTTGAGACTTCTTTAAATCCTCAACAGCTTCTTATTGAGTTGCAAAACAATTGAGGAAGGAGCT  | 170  |
| Phare_v1     | 171  | TGGACGTATTAAGACTATTGATAAAGGTCCTCGATGCATTGATTAGATATTATTTTTTTTGGTAGACAAATAATTAACTCTGAA    | 255  |
| Phare_v2     | 171  | TGGACGTATTAAGACTATTGATAAAGGTCCTCGATGCATTGATTAGATATTATTTTTTTTGGTAGACAAATAATTAACTCTGAA    | 255  |
| P.oryctolagi | 171  | TGGACGTATTAAGACTATTGATAAAGGTCCTCGATGCATTGATTAGATATTATTTTTTTTGGTAGACAAATAATTAACTCTGAA    | 255  |
| Phare_v1     | 256  | TCATTAATTTGTTCTCATCTCAGAATACTTGAACGTCCATTGTTCTAAAACCGCTTTCTGAGTAAATGATAATATAGATAAGGT    | 340  |
| Phare_v2     | 256  | TCATTAATTTGTTCTCATCTCAGAATACTTGAACGTCCATTGTTCTAAAACCGCTTTCTGAGTAAATGATAATATAGATAAGGT    | 340  |
| P.oryctolagi | 256  | TCACCTATTTGTTCTCATCTCAGGATACTTGAACGTCCATTGTTCTAAAACCACTTTCTGAGTAAATAGTAGTATAGATAAGAT    | 340  |
| Phare_v1     | 341  | AAATATTTTCTAATTATAAATTAGTATATCGAGTGATATTATTCATCTGTTACCGGGTTATCTATAGTTTCATATCTTAGAAA     | 425  |
| Phare_v2     | 341  | AAATGTTTTTCTAATTATAAATTAGTATATCGAGTGATATTATTCATCTGTTACCGGGTTATCTATAGTTTCATATCTTAGAAA    | 425  |
| P.oryctolagi | 341  | AAATGTTTTTCTAATTATAAATTAGTATATCGAATGATATTATTCATCTGTTACCGGATTATCTATAGTTTCTATCTTAAGAAA    | 425  |
| Phare_v1     | 426  | AATAGATAATCTTAATATTAACCAGTTTGGCATTTTTATATAAAAAATAAAGTATAAATTTAGTTCTGGTCCCTATAAAGCA      | 510  |
| Phare_v2     | 426  | AATAGATAATCTTAATATTAACCAGTTTGGCATTTTTATATAAAAAATAAAGTATAAATTTAGTTCTGGTCCCTATAAAGCA      | 510  |
| P.oryctolagi | 426  | AACAGATAGTCTTAATATTAACCAGTTTGGCATTTTTATATAAAGATAAAGTATAAATTTAGTTTGGATCTTATAAATCA        | 510  |
| Phare_v1     | 511  | CCACACATATTATGGCTATTTTGAATCTCACTCCTGATTCTTTTCTGATGGTGGTATTTCATTCATATGGTTCTATATTATGG     | 595  |
| Phare_v2     | 511  | CCTACACATATTATGGCTATTTTGAATCTCACTCCTGATTCTTTTCTGATGGTGGTATTTCATTCATATGGTTCTATATTATGG    | 595  |
| P.oryctolagi | 511  | CCTACACATATTATGGCTATTTTGAATCTCACTCCTGATCTTTTCTGATGGTGGCATTTCATTCATATGATTCCTATATTGATAG   | 595  |
| Phare_v1     | 596  | ATGCTGAGAAGTTTATAAAGCTGGTGCAACAATAATTGATATTGGTGGACAGTCTACAAGGCTGGTTCTCATATTGTTTCTAC     | 680  |
| Phare_v2     | 596  | ATGCTGAGAAGTTTATAAAGCTGGTGCAACAATAATTGATATTGGTGGACAGTCTACAAGGCTGGTTCTCATATTGTTTCTAC     | 680  |
| P.oryctolagi | 596  | ATGCAAGAGAAGTTTGTAAAGCTGGTGCAACAATAATTGATATTGGTGGACAGTCTACAAGGCTGGTTCTCATATTATTTCTAT    | 680  |
| Phare_v1     | 681  | AGATGAAGAAATATCTCGAGTTATTCTGCTATAAAACGACTTTTAGAAACATATCCTGATATTTTAGTAAGTATAGATACATTT    | 765  |
| Phare_v2     | 681  | AGATGAAGAAATATCTCGAGTTATTCTGCTATAAAACGACTTTTAGAAACATATCCTGATATTTTAGTAAGTATAGATACATTT    | 765  |
| P.oryctolagi | 681  | AGAAGAGAAGAAATTTCTCGGGTTGTTCTGCTATAAAACGACTTTTAAACATATCCGATATTTTAGTAAGTATAGATACATTT     | 765  |
| Phare_v1     | 766  | CGTTCTGAAGTTGCAGAAGAAGCAATTAGGGCCGGTGCTAGTCTTGTGTAATGATGTAACAGGAGGGAAATATGACCCGAAAATGT  | 850  |
| Phare_v2     | 766  | CGTTCTGAAGTTGCAGAAGAAGCAATTAGGGCCGGTGCTAGTCTTGTGTAATGATGTAACAGGAGGGAAATATGACCCGAAAATGT  | 850  |
| P.oryctolagi | 766  | CGTTCTGAAGTTGCAGAAGAAGCAATTAGAGCCGGTGCTTGTCTTGTGTAATGATGTAACGGAGGGAAATATGATCCGAAAATGT   | 850  |
| Phare_v1     | 851  | TTAAACTGTGGCTAAATTTCAAGTTCCAATATGTATAATGCATATGAGAGGCGATTTTTTAACCATGGATAATTAAACAGATTA    | 935  |
| Phare_v2     | 851  | TTAAAGACTGTGGCTAAATTTCAAGTTCCAATATGTATAATGCATATGAGAGGCGATTTTTTAACCATGGATAATTAAACAGATTA  | 935  |
| P.oryctolagi | 851  | TTAAAACTGTGCTAAATTTCAAGTTCCGATATGTATAATGCATATGAGAGGCGATTTTTTAACCATGGATAATTAAACAGATTA    | 935  |
| Phare_v1     | 936  | TGGTGCTGATATTGTAAAGCAGATCACTATAGAGTTAGAAGAAGTTGCTTATTTGTGCCGAAAATTCGGGTATTCTCGCTGGAAT   | 1020 |
| Phare_v2     | 936  | TGGTACTGATATTGTAAAGCAGATCACTATAGAGTTAGAAGAATTGCTTATTTGTGCCGAAAATTCGGGTATTCTCGCTGGAAT    | 1020 |
| P.oryctolagi | 936  | TGGTACTGATATTGTAAAGCAATCACTATGAGGAGTTAGAAGAATTGCTTATTTGTGCCGAAAATTCGGGTATTCTCGCTGGAAT   | 1020 |
| Phare_v1     | 1021 | ATTATTTTAGATCCCGGTTAGGATTTGCTAAAACCTTCATATCAGAATATAGAGTTATTGAGAAGGTTTAAATGAATAAAAATCTC  | 1105 |
| Phare_v2     | 1021 | ATTATTTTAGATCCCGGTTAGGATTTGCTAAAACCTTCATATCAGAATATAGAGTTATTGAGAAGGTTTAAATGAATAAAAATCTC  | 1105 |
| P.oryctolagi | 1021 | ATTATTTTAGATCCCTGGGTTAGGATTTGCTAAAACCTTCATATCAGAATATAGAGTTATTAGAAGGTTTAAATGAATAAAAATCTC | 1105 |
| Phare_v1     | 1106 | AGCCTTGTTTTAGAGGTTTCCCTGGTTGCTTGGTCCCTAGTCGAAAAAGATTTACAGGCTGTATTACAGGGGATATTGTTCCAAG   | 1190 |
| Phare_v2     | 1106 | AGCCTTGTTTTAGAGGTTTCCCTGGTTGCTTGGTCCCTAGTCGAAAAAGATTTACAGGCTGTATTACAGGGGATATTGTTCCAAG   | 1190 |
| P.oryctolagi | 1106 | AGAGTTGCTTCTAGTGGTTTCCCTGGTTGCTCGGTCCAGTCGAAAAAGATTTACAGGATGTTGTTACAGGGGATATTGTTCCAAG   | 1190 |
| Phare_v1     | 1191 | AGATAGGATTTGGGGCAGGGCTGCTGCTGTTACTGCATCTATTTAGGAGGATGTGATATTACGGATTTCATGATGTTTTTGAA     | 1275 |
| Phare_v2     | 1191 | AGATAGGATTTGGGGCAGGGCTGCTGCTGTTACTGCATCTATTTAGGAGGATGTGATATTACGGATTTCATGATGTTTTTGAA     | 1275 |
| P.oryctolagi | 1191 | AGATAGATTTTGGGGTACGGCTGCTGCTGTTACTGCATCTATTTAGGAGGATGTGATATTACGGATTTCATGATGTTTTTGAA     | 1275 |
| Phare_v1     | 1276 | ATGTGCAAGGTGTTAAAGACTTCAGATGCTAT                                                        | 1307 |
| Phare_v2     | 1276 | ATGTGCAAGGTGTTAAAGACTTCAGATGCTAT                                                        | 1307 |
| P.oryctolagi | 1276 | ATGTGTAAGTTTCAAGGATTTTCAGATGCTAT                                                        | 1307 |

**Supplemental Figure S5. Nucleotide sequences of the dihydropteroate synthase (*dhps*) gene (enclosed in square brackets) and its upstream dihydro-6-hydroxymethylpterin pyrophosphokinase (*pppk*) gene of *Pneumocystis* from hares and rabbits. Highly conserved sequences are highlighted in dark shadow. Nucleotide variations resulting in amino acid changes in the *dhps* gene are indicated by red squares. Phare\_v1, *P. sp. 'townsendii'* variant 1; Phare\_v2, *P. sp. 'townsendii'* variant 2. Numbers on the two ends of each sequence correspond to the nucleotide positions of the full-length sequence of the region amplified by PCR deposited in GenBank with accession no. listed in Table S6.**
