# Supplementary material for: Development of Highly Efficient Universal Pneumocystis Primers and Their Application in Investigating the Prevalence and Genetic Diversity of Pneumocystis in Wild Hares and Rabbits
Source: MDPI journal article supplement (doi:10.3390/jof10050355), 2024-05-15
Supplement: s1 [file s1]

**Supplementary Table S3 *Pneumocystis* samples used for testing universal primers.**

| Host common names | Host scientific names           | <i>Pneumocystis</i> species | Sampling countries & years | Sample type | References |
|-------------------|---------------------------------|-----------------------------|----------------------------|-------------|------------|
| Human             | <i>Homo sapiens</i>             | <i>P. jirovecii</i>         | USA, 1986                  | Frozen lung | [32]       |
| House mouse       | <i>Mus musculus</i>             | <i>P. murina</i>            | USA, 2012                  | Frozen lung | [30]       |
| Prairie dog       | <i>Cynomys ludovicianus</i>     | <i>P. ludoviciani</i>       | USA, 2010                  | FFPE        | [42]       |
| Rhesus macaque    | <i>Macaca mulatta</i>           | <i>P. macacae</i>           | USA, 2018                  | Frozen lung | [24]       |
| Ferret            | <i>Mustela putorius furo</i>    | <i>Pneumocystis</i> spp.    | USA, 1999                  | Frozen lung | [43]       |
| Hare              | <i>Lepus townsendii</i>         | <i>P. sp. 'townsendii'</i>  | Canada, 2020               | Frozen lung | This study |
| Brown rat         | <i>Rattus norvegicus</i>        | <i>P. carinii</i>           | Austria, 2004              | FFPE lung   | [35]       |
| European rabbit   | <i>Oryctolagus cuniculus</i>    | <i>P. oryctolagi</i>        | Austria, 2008              | FFPE lung   | [35]       |
| Whippet dog       | <i>Canis lupus familiaris</i>   | <i>P. canis</i>             | Austria, 2013              | FFPE lung   | [44]       |
| Pig               | <i>Sus scrofa domesticus</i>    | <i>Pneumocystis</i> spp.    | Austria, 2019              | Frozen lung | [35]       |
| Goat              | <i>Capra aegagrus hircus</i>    | <i>Pneumocystis</i> spp.    | Austria, 2017              | FFPE lung   | [35]       |
| Shrew             | <i>Neomys anomalus</i>          | <i>Pneumocystis</i> spp.    | Austria, 2015              | FFPE lung   | [37]       |
| River rat         | <i>Myocastor coypus</i>         | <i>Pneumocystis</i> spp.    | Italy, 2013-14             | Frozen lung | [41]       |
| Squirrel          | <i>Callosciurus finlaysonii</i> | <i>Pneumocystis</i> spp.    | Italy, 2014                | Frozen lung | [41]       |
| Cat               | <i>Felis catus</i>              | <i>Pneumocystis</i> spp.    | Italy, 2017-18             | Frozen lung | [40]       |

FFPE, formalin-fixed, paraffin-embedded; mtLSU, mitochondrial large-subunit rRNA gene; mtSSU, mitochondrial small-subunit rRNA gene. \*Indicating sequences identical to existing sequences in GenBank, with one accession no. shown if both genes are included in the mitochondrial genome sequence.
