# Supplementary material for: Development of Highly Efficient Universal Pneumocystis Primers and Their Application in Investigating the Prevalence and Genetic Diversity of Pneumocystis in Wild Hares and Rabbits
Source: MDPI journal article supplement (doi:10.3390/jof10050355), 2024-05-15
Supplement: s1 [file s1]

**Supplemental Tables S4.** Nucleotide identity and similarity among *Pneumocystis* from different animals for the dihydropteroate synthase (*dhps*) gene, nuclear rRNA operon (rDNA) and mitochondrial genome DNA (mtDNA).

***dhps* sequence identity and similarity (~1.3 kb aligned length\*)**

| Identity Scores (%), above the diagonal |       |       |      |      |      |      |      |      |      |
|-----------------------------------------|-------|-------|------|------|------|------|------|------|------|
|                                         | Ph_v1 | Ph_v2 | Pory | Pcan | Pmac | Pjir | Pcar | Pwak | Pmur |
| Ph_v1                                   | —     | 98.4  | 92.2 | 82.2 | 80.8 | 82.7 | 80.2 | 79.4 | 80.6 |
| Ph_v2                                   | 98.4  | —     | 92.2 | 81.9 | 80.9 | 82.1 | 80.3 | 79.3 | 80.8 |
| Pory                                    | 92.2  | 92.2  | —    | 83.7 | 83.3 | 83.7 | 80.9 | 80.4 | 81.3 |
| Pcan                                    | 82.2  | 81.9  | 83.7 | —    | 83.1 | 84.6 | 82.9 | 82.3 | 82.8 |
| Pmac                                    | 80.8  | 80.9  | 83.3 | 83.1 | —    | 88.0 | 82.0 | 81.1 | 81.9 |
| Pjir                                    | 82.7  | 82.1  | 83.7 | 84.6 | 88.0 | —    | 81.9 | 81.4 | 82.9 |
| Pcar                                    | 80.2  | 80.3  | 80.9 | 82.9 | 82.0 | 81.9 | —    | 93.7 | 93.9 |
| Pwak                                    | 79.4  | 79.3  | 80.4 | 82.3 | 81.1 | 81.4 | 93.7 | —    | 94.9 |
| Pmur                                    | 80.6  | 80.8  | 81.3 | 82.8 | 81.9 | 82.9 | 93.9 | 94.9 | —    |

Similarity Scores (%), below the diagonal

\*Including a small portion of the dihydro-6-hydroxymethylpterin pyrophosphokinase (pppk) gene upstream of the *dhps* gene (Figure S5).

**rDNA sequence identity and similarity (~6.4 kb aligned length)**

| Identity Scores (%), above the diagonal |       |       |      |      |      |      |      |      |      |
|-----------------------------------------|-------|-------|------|------|------|------|------|------|------|
|                                         | Ph_v1 | Ph_v2 | Pory | Pcan | Pmac | Pjir | Pcar | Pwak | Pmur |
| Ph_v1                                   | —     | 99.2  | 96.3 | 80.3 | 79.3 | 86.2 | 78.8 | 84.3 | 79.1 |
| Ph_v2                                   | 99.2  | —     | 96.5 | 80.5 | 79.3 | 86.2 | 78.9 | 84.3 | 79.1 |
| Pory                                    | 96.3  | 96.5  | —    | 80.3 | 79.1 | 86.2 | 78.7 | 84.0 | 79.1 |
| Pcan                                    | 80.3  | 80.5  | 80.3 | —    | 85.5 | 83.8 | 85.4 | 82.3 | 86.3 |
| Pmac                                    | 79.3  | 79.3  | 79.1 | 85.5 | —    | 85.6 | 84.3 | 81.0 | 85.0 |
| Pjir                                    | 86.2  | 86.2  | 86.2 | 83.8 | 85.6 | —    | 82.1 | 87.7 | 82.9 |
| Pcar                                    | 78.8  | 78.9  | 78.7 | 85.4 | 84.3 | 82.1 | —    | 88.0 | 94.0 |
| Pwak                                    | 84.3  | 84.3  | 84.0 | 82.3 | 81.0 | 87.7 | 88.0 | —    | 89.0 |
| Pmur                                    | 79.1  | 79.1  | 79.1 | 86.3 | 85.0 | 82.9 | 94.0 | 89.0 | —    |

Similarity Scores (%), below the diagonal

**mtDNA sequence identity and similarity (~19.3 kb aligned length\*)**

| Identity Scores (%), above the diagonal |       |       |      |      |      |      |      |      |      |
|-----------------------------------------|-------|-------|------|------|------|------|------|------|------|
|                                         | Ph_v1 | Ph_v2 | Pory | Pcan | Pmac | Pjir | Pcar | Pwak | Pmur |
| Ph_v1                                   | —     | 94.7  | 84.7 | 71.6 | 70.2 | 69.0 | 66.6 | 67.3 | 69.5 |
| Ph_v2                                   | 94.7  | —     | 84.3 | 71.4 | 70.2 | 68.8 | 66.7 | 67.2 | 69.4 |
| Pory                                    | 84.7  | 84.3  | —    | 72.9 | 71.2 | 69.3 | 67.3 | 68.3 | 70.4 |
| Pcan                                    | 71.6  | 71.4  | 72.9 | —    | 73.2 | 70.3 | 69.3 | 69.7 | 71.8 |
| Pmac                                    | 70.2  | 70.2  | 71.2 | 73.2 | —    | 76.5 | 67.7 | 68.6 | 70.1 |
| Pjir                                    | 69.0  | 68.8  | 69.3 | 70.3 | 76.5 | —    | 65.9 | 66.1 | 68.4 |
| Pcar                                    | 66.6  | 66.7  | 67.3 | 69.3 | 67.7 | 65.9 | —    | 75.7 | 78.0 |
| Pwak                                    | 67.3  | 67.2  | 68.3 | 69.7 | 68.6 | 66.1 | 75.7 | —    | 80.6 |
| Pmur                                    | 69.5  | 69.4  | 70.4 | 71.8 | 70.1 | 68.4 | 78.0 | 80.6 | —    |

Similarity Scores (%), below the diagonal

\*Including 15 protein-coding genes and 3 rRNA genes concatenated for sequence alignment. The names of *Pneumocystis* species and variants are abbreviated as follows: Ph\_v1, *P. sp.* 'townsendii' variant 1; Ph\_v2, *P. sp.* 'townsendii' variant 2; Pory, *P. oryctolagi*; Pcan, *P. canis*; Pmac, *P. macacae*; Pjir, *P. jirovecii*; Pcar, *P. carinii*; Pwak, *P. wakefieldiae*; Pmur, *P. murina*. GenBank accession numbers for these sequences are listed in Table S6.
