# Supplementary material for: Development of Highly Efficient Universal Pneumocystis Primers and Their Application in Investigating the Prevalence and Genetic Diversity of Pneumocystis in Wild Hares and Rabbits
Source: MDPI journal article supplement (doi:10.3390/jof10050355), 2024-05-15
Supplement: s1 [file s1]

**Supplemental Tables S5.** Pairwise genetic distance among *Pneumocystis* from different animals at the dihydropteroate synthase (*dhps*) gene, nuclear rRNA operon (rDNA) and mitochondrial genome DNA (mtDNA).

**Genetic distance based on *dhps* nucleotide sequence (~1.3 kb aligned length\*)**

|       | Ph_v1  | Ph_v2  | Pory   | Pcan   | Pmac   | Pjir   | Pcar   | Pwak   |
|-------|--------|--------|--------|--------|--------|--------|--------|--------|
| Ph_v2 | 0.0162 |        |        |        |        |        |        |        |
| Pory  | 0.0680 | 0.0680 |        |        |        |        |        |        |
| Pcan  | 0.1808 | 0.1847 | 0.1779 |        |        |        |        |        |
| Pmac  | 0.2051 | 0.2031 | 0.1901 | 0.1877 |        |        |        |        |
| Pjir  | 0.1733 | 0.1801 | 0.1782 | 0.1717 | 0.1281 |        |        |        |
| Pcar  | 0.2102 | 0.2091 | 0.2173 | 0.1906 | 0.2023 | 0.2010 |        |        |
| Pwak  | 0.2222 | 0.2233 | 0.2253 | 0.1986 | 0.2163 | 0.2091 | 0.0665 |        |
| Pmur  | 0.2059 | 0.2029 | 0.2120 | 0.1906 | 0.2051 | 0.1880 | 0.0632 | 0.0524 |

\*Including a small portion of the dihydro-6-hydroxymethylpterin pyrophosphokinase (pppk) gene upstream of the *dhps* gene (Figure S5).

**Genetic distance based on rDNA sequence (~6.4 kb aligned length)**

|       | Ph_v1  | Ph_v2  | Pory   | Pcan   | Pmac   | Pjir   | Pcar   | Pwak   |
|-------|--------|--------|--------|--------|--------|--------|--------|--------|
| Ph_v2 | 0.0079 |        |        |        |        |        |        |        |
| Pory  | 0.0273 | 0.0248 |        |        |        |        |        |        |
| Pcan  | 0.0756 | 0.0716 | 0.0760 |        |        |        |        |        |
| Pmac  | 0.0738 | 0.0726 | 0.0740 | 0.1089 |        |        |        |        |
| Pjir  | 0.0690 | 0.0680 | 0.0698 | 0.0900 | 0.0637 |        |        |        |
| Pcar  | 0.0823 | 0.0813 | 0.0841 | 0.1174 | 0.1223 | 0.1034 |        |        |
| Pwak  | 0.0866 | 0.0859 | 0.0884 | 0.1024 | 0.1042 | 0.1022 | 0.0482 |        |
| Pmur  | 0.0843 | 0.0824 | 0.0844 | 0.1073 | 0.1158 | 0.0950 | 0.0541 | 0.0501 |

**Genetic distance based on mtDNA (~19.3 kb aligned length\*)**

|       | Ph_v1  | Ph_v2  | Pory   | Pcan   | Pmac   | Pjir   | Pcar   | Pwak   |
|-------|--------|--------|--------|--------|--------|--------|--------|--------|
| Ph_v2 | 0.0520 |        |        |        |        |        |        |        |
| Pory  | 0.1500 | 0.1546 |        |        |        |        |        |        |
| Pcan  | 0.3048 | 0.3095 | 0.2947 |        |        |        |        |        |
| Pmac  | 0.3118 | 0.3132 | 0.3036 | 0.2775 |        |        |        |        |
| Pjir  | 0.3275 | 0.3307 | 0.3251 | 0.3122 | 0.2212 |        |        |        |
| Pcar  | 0.3424 | 0.3437 | 0.3341 | 0.3107 | 0.3226 | 0.3466 |        |        |
| Pwak  | 0.3357 | 0.3397 | 0.3279 | 0.3074 | 0.3176 | 0.3517 | 0.2097 |        |
| Pmur  | 0.3199 | 0.3236 | 0.3079 | 0.2966 | 0.3055 | 0.3434 | 0.1933 | 0.1604 |

\*Including 15 protein-coding genes and 3 rRNA genes concatenated for sequence alignment.

The names of *Pneumocystis* species and variants are abbreviated as follows: Ph\_v1, *P. sp. 'townsendii'* variant 1; Ph\_v2, *P. sp. 'townsendii'* variant 2; Pory, *P. oryctolagi*; Pcan, *P. canis*; Pmac, *P. macacae*; Pjir, *P. jirovecii*; Pcar, *P. carinii*; Pwak, *P. wakefieldiae*; Pmur, *P. murina*. GenBank accession numbers for these sequences are listed in Table S6.
