# Supplementary material for: Development of Highly Efficient Universal Pneumocystis Primers and Their Application in Investigating the Prevalence and Genetic Diversity of Pneumocystis in Wild Hares and Rabbits
Source: MDPI journal article supplement (doi:10.3390/jof10050355), 2024-05-15
Supplement: s1 [file s1]

**Supplemental Table S6.** GenBank accession numbers for *Pneumocystis* sequences involved in this study.

| Species and strains                  | mtLSU      | mtSSU      | mtDNA                  | rDNA                  | <i>dhps</i>               |
|--------------------------------------|------------|------------|------------------------|-----------------------|---------------------------|
| <i>P. sp. 'townsendii'</i> variant 1 | PP477327   | PP477339   | PP484880               | PP476603              | PP477274                  |
| <i>P. sp. 'townsendii'</i> variant 2 | PP477328   | PP477340   | PP484881               | PP476604              | PP477275                  |
| <i>P. sp. 'townsendii'</i> variant 3 | PP477329   | PP477341   | n/a                    | n/a                   | n/a                       |
| <i>P. sp. 'townsendii'</i> variant 4 | n/a        | PP477342   | n/a                    | n/a                   | n/a                       |
| <i>P. sp. 'townsendii'</i> variant 5 | n/a        | PP477343   | n/a                    | n/a                   | n/a                       |
| <i>P. oryctolagi</i> variant 1       | PP477330   | PP477344   | n/a                    | n/a                   | n/a                       |
| <i>P. oryctolagi</i> variant 2       | PP477331   | PP477344   | n/a                    | n/a                   | n/a                       |
| <i>P. oryctolagi</i> RABM            | MT726213*  | MT726213*  | MT726213 <sup>†</sup>  | MT780543 <sup>†</sup> | PORY_002119 <sup>†</sup>  |
| <i>P. canis</i> AU                   | MT726217*  | MT726217*  | MT726217 <sup>†</sup>  | MT780538 <sup>†</sup> | PCANB_001404 <sup>†</sup> |
| <i>P. macacae</i> P2C                | MT726214*  | MT726214*  | MT726214 <sup>†</sup>  | MT780541 <sup>†</sup> | PMAC_002379 <sup>†</sup>  |
| <i>P. jirovecii</i> RU7              | NC_020331* | NC_020331* | NC_020331 <sup>†</sup> | MT780540 <sup>†</sup> | T551_02230 <sup>†</sup>   |
| <i>P. carinii</i> B80                | JX499145*  | JX499145*  | JX499145 <sup>†</sup>  | MT780539 <sup>†</sup> | T552_03074 <sup>†</sup>   |
| <i>P. wakefieldiae</i> 2A            | MT726211   | MT726211*  | MT726211 <sup>†</sup>  | MT780544 <sup>†</sup> | MERGE_001568 <sup>†</sup> |
| <i>P. murina</i> B123                | JX499144*  | JX499144*  | JX499144 <sup>†</sup>  | MT780542 <sup>†</sup> | PNEG_03560 <sup>†</sup>   |
| <i>P. ludoviciani</i> <sup>φ</sup>   | MT726212*  | MT726212*  | MT726212               | PP476606              | PP477272                  |
| <i>Pneumocystis</i> in squirrel      | PP484879*  | PP484879*  | PP484879               | PP476605              | PP477273                  |
| <i>Pneumocystis</i> in ferret        | P477333    | PP477345   | n/a                    | n/a                   | n/a                       |
| <i>Pneumocystis</i> in pig           | P477334    | PP477346   | n/a                    | n/a                   | n/a                       |
| <i>Pneumocystis</i> in goat          | P477337    | PP477349   | n/a                    | n/a                   | n/a                       |
| <i>Pneumocystis</i> in shrew         | P477336    | PP477348   | n/a                    | n/a                   | n/a                       |
| <i>Pneumocystis</i> in river rat     | P477335    | PP477347   | n/a                    | n/a                   | n/a                       |
| <i>Pneumocystis</i> in cat           | P477338    | PP477350   | n/a                    | n/a                   | n/a                       |

\* Included in the respective mtDNA sequences.

<sup>†</sup> From previous genome studies by Ma *et al.* [30] and Cisse *et al.* [24], with the *dhps* sequences available from GenBank using the locus tags listed.

<sup>φ</sup> *Pneumocystis* from the black-tailed prairie dog recently registered in MycoBank with ID: MBT10019263 (<https://www.mycobank.org>).

Abbreviations: mtSSU, mitochondrial small-subunit rRNA gene; mtLSU, mitochondrial large-subunit rRNA gene; mtDNA, mitochondrial genome DNA; rDNA, nuclear rRNA operon; *dhps*, dihydropteroate synthase gene; n/a, not available.
