# Supplementary material for: Development of Highly Efficient Universal Pneumocystis Primers and Their Application in Investigating the Prevalence and Genetic Diversity of Pneumocystis in Wild Hares and Rabbits
Source: MDPI journal article supplement (doi:10.3390/jof10050355), 2024-05-15
Supplement: s1 [file s1]

|            |     |                                                                                |              |                     |    |
|------------|-----|--------------------------------------------------------------------------------|--------------|---------------------|----|
| Hare_Ph_v1 | 1   | TACAAATCGGACTAGGATATAGCTGGTTTTCTGCGAAATTTGTA                                   | ATAGCAAAGTGT | TATGAG-ATAA-AATTAG  | 73 |
| Hare_Ph_v2 | 1   | TACAAATCGGACTAGGATATAGCTGGTTTTCTGCGAAATTTGTA                                   | ATAGCAAAGTGT | TATGAGTTGTAACAATTAG | 75 |
| Hare_Ph_v3 | 1   | TACAAATCGGACTAGGATATAGCTGGTTTTCTGCGAAATTTGTA                                   | ATAGCAAAGTGT | TATGAG-ATAA-AATTAG  | 73 |
| P.ory_v1   | 1   | TACAAATCGGACTAGGATATAGCTGGTTTTCTGCGAAATTTGTA                                   | ATAGCAAAGTGT | TATGTA-ATAA--ATTAG  | 72 |
| P.ory_v2   | 1   | TACAAATCGGACTAGGATATAGCTGGTTTTCTGCGAAATTTGTA                                   | ATAGCAAAGTGT | TATGTA-ATAA--ATTAG  | 72 |
| P.ory_ref  | 1   | TACAAATCGGACTAGGATATAGCTGGTTTTCTGCGAAATTTGTA                                   | ATAGCAAAGTGT | TATGTA-ATAA--ATTAG  | 72 |
|            |     |                                                                                |              |                     |    |
| Hare_Ph_v1 | 74  | TAGGTATAGCACTGAATATCTCATTAGAGGGGAGTATGAAATATTTTATCTCGGATATTTAATCTCAGAATGACTA   | 148          |                     |    |
| Hare_Ph_v2 | 76  | TAGGTATAGCACTGAATATCTCTTACAGAGGGGAGTATGAAATATTTTATCTCGGATATTTAATCTCAGAATGACTA  | 150          |                     |    |
| Hare_Ph_v3 | 74  | TAGGTATAGCACTGAATATCTCATTAGAGGGGAGTATGAAATATTTTATCTCGGATATTTAATCTCAGAATGACTA   | 148          |                     |    |
| P.ory_v1   | 73  | TAGGTATAGCACTGAATATTCATTACAGAGGGGAGTACGTAAGTATTTTATCTCGGATATTTAATCTCAGAATGACTA | 147          |                     |    |
| P.ory_v2   | 73  | TAGGTATAGCACTGAATATTCATTACAGAGGGGAGTACGTAAGTATTTTATCTCGGATATTTAATCTCAGAATGACTA | 147          |                     |    |
| P.ory_ref  | 73  | TAGGTATAGCACTGAATATTCATTACAGAGGGGAGTACGTAAGTATTTTATCTCGGATATTTAATCTCAGAATGACTA | 147          |                     |    |
|            |     |                                                                                |              |                     |    |
| Hare_Ph_v1 | 149 | ATTTAATATAAAATAAATGGACTTCTTGCGATTAAGGTGGGAAGTCAAAAGGGAAACAGCCCAAGAACAGAATGAA   | 223          |                     |    |
| Hare_Ph_v2 | 151 | ATTGGAGTAATAAAACAAATGGACTTCTTGCGATTAAGGTGGGAAGTCAAAAGGGAAACAGCCCAAGAACAGATGAA  | 225          |                     |    |
| Hare_Ph_v3 | 149 | ATTTAATATAAAATAAATGGACTTCTTGCGATTAAGGTGGGAAGTCAAAAGGGAAACAGCCCAAGAACAGAATGAA   | 223          |                     |    |
| P.ory_v1   | 148 | ATTTATAAGATAAAATGGATGGACTTTTTCGCGAAGGTGGGAAGTCAAGAGGGAAACAGCCCAAGAACAGAATGAA   | 222          |                     |    |
| P.ory_v2   | 148 | ATTTATAAGATAAAATCGATGGACTTTTTCGCGAAGGTGGGAAGTCAAGAGGGAAACAGCCCAAGAACAGAATGAA   | 222          |                     |    |
| P.ory_ref  | 148 | ATTTATAAGATAAAATGGATGGACTTTTTCGCGAAGGTGGGAAGTCAAGAGGGAAACAGCCCAAGAACAGAATGAA   | 222          |                     |    |
|            |     |                                                                                |              |                     |    |
| Hare_Ph_v1 | 224 | AGCTCCGGAATTAATTTAAGTGAAAGAAAGAAAGGTGATTTCTCAGTGACAGTCAAGAAGTGGGCTTGGAACACAG   | 298          |                     |    |
| Hare_Ph_v2 | 226 | AGCTCCAAATTAATTTGAGTGAAAGAAAGAAAGGTGATTTCTCGGGGACAGTCAAGAAGTGGGCTTGGAACACAG    | 300          |                     |    |
| Hare_Ph_v3 | 224 | AGCTCCGGAATTAATTTAAGTGAAAGAAAGAAAGGTGATTTCTCAGTGACAGTCAAGAAGTGGGCTTGGAACACAG   | 298          |                     |    |
| P.ory_v1   | 223 | AGCTCCGGAATTAATTTGAGTGAAAGAAAGAAAGGTGTTTTTTCAGAGACAGTCAAGAAGTGGGCTTGGAACACAG   | 297          |                     |    |
| P.ory_v2   | 223 | AGCTCCTGAATTAATTTGAGTGAAAGAAAGAAAGGTGTTTTTTCAGAGACAGTCAAGAAGTGGGCTTGGAACACAG   | 297          |                     |    |
| P.ory_ref  | 223 | AGCTCCGGAATTAATTTGAGTGAAAGAAAGAAAGGTGTTTTTTCAGAGACAGTCAAGAAGTGGGCTTGGAACACAG   | 297          |                     |    |
|            |     |                                                                                |              |                     |    |
| Hare_Ph_v1 | 299 | CCATCTTTTAAAGAACACGTAATAAGTGCAATGATCTAGGAGAGATTGCGTCGAAAAATACAGGATCTGAAAATTTA  | 373          |                     |    |
| Hare_Ph_v2 | 301 | CCATCTTTTAAAGAACACGTAATAGTGCAATGATCTGATGAGAGATTGCGTCGAAAAATACAGGATCTGAAAATTTA  | 375          |                     |    |
| Hare_Ph_v3 | 299 | CCATCTTTTAAAGAACACGTAATAAGTGCAATGATCTAGGAGAGATTGCGTCGAAAAATACAGGATCTGAAAATTTA  | 373          |                     |    |
| P.ory_v1   | 298 | CCATCTTTTAAAGAACACGTAATAGTGCAATGATCTATGAAAGATTGCGCCAAAAATACAGGATCT-AAAATTTG    | 371          |                     |    |
| P.ory_v2   | 298 | CCATCTTTTAAAGAACACGTAATAGTGCAATGATCTATGAAAGATTGCGCCAAAAATACAGGATCT-AAAATTTG    | 371          |                     |    |
| P.ory_ref  | 298 | CCATCTTTTAAAGAACACGTAATAGTGCAATGATCTATGAAAGATTGCGCCAAAAATACAGGATCT-AAAATTTG    | 371          |                     |    |
|            |     |                                                                                |              |                     |    |
| Hare_Ph_v1 | 374 | TGCTTAAATCTGTCTAATAAGGAAGTTAAGAAGGAATTAAATTTTC-TTGTGGGTAGCAGAACATTTAGTAACCTAGA | 447          |                     |    |
| Hare_Ph_v2 | 376 | TGCTTAAATCTGTCTAGAAATGAATTTTAGTACTTCCATAAAATTCATTGTGGGTAGCAGAACATTTAGTAACCTAGA | 450          |                     |    |
| Hare_Ph_v3 | 374 | TGCTTAAATCTGTCTAATAAGGAAGTTAAGAAGGAATTAAATTTTC-TTGTGGGTAGCAGAACATTTAGTAACCTAGA | 447          |                     |    |
| P.ory_v1   | 372 | TGCTTAAATCTGTCTGTGAAGAAATGAA-----TTGAATTTCTTTATGGGTAGCAGAACATTTAGTATCTAAA      | 439          |                     |    |
| P.ory_v2   | 372 | TGCTTAAATCTGTCTGTGAAGAAATGAA-----TTGAATTTCTTTATGGGTAGCAGAACATTTAGTATCTAAA      | 439          |                     |    |
| P.ory_ref  | 372 | TGCTTAAATCTGTCTGTGAAGAAATGAA-----TTGAATTTCTTTATGGGTAGCAGAACATTTAGTATCTAAA      | 439          |                     |    |
|            |     |                                                                                |              |                     |    |
| Hare_Ph_v1 | 448 | AGAAGGATAATCTTAGATTATTTGGATAGAACTAAAGAGAGAATGCTGACATGAG                        | 502          |                     |    |
| Hare_Ph_v2 | 451 | AGAAGAATAATCTTTGATTATTTGGATAGAACTAAAGAGAGAATGCTGACATGAG                        | 505          |                     |    |
| Hare_Ph_v3 | 448 | AGAAGGATAATCTTAGATTATTTGGATAGAAGCTAAAGAGAGAATGCTGACATGAG                       | 502          |                     |    |
| P.ory_v1   | 440 | AGAAGAATAATCTTTGATTGTTTGGATAGAACTAAAGAGAGAATGCTGACATGAG                        | 494          |                     |    |
| P.ory_v2   | 440 | AGAAGAATAATCTTTGATTGTTTGGATAGAACTAAAGAGAGAATGCTGACATGAG                        | 494          |                     |    |
| P.ory_ref  | 440 | AGAAGAATAATCTTTGATTGTTTGGATAGAACTAAAGAGAGAATGCTGACATGAG                        | 494          |                     |    |

**Supplemental Figure S4.** Variation of mitochondrial large-subunit rRNA (mtLSU) sequences of *Pneumocystis* variants in hares and rabbits aligned with *P. oryctolagi* reference sequence (P.ory\_ref, from Michigan, USA. GenBank accession no. MT726213). Identical nucleotides among multiple variants are highlighted in dark shadow. The 3 variants of *P. sp. 'townsendii'* from hares are represented by Hare\_Ph\_v1 to Hare\_Ph\_v3. The 2 variants of *P. oryctolagi* are represented by P.ory\_v1 and P.ory\_v2. All sequences determined in this study have been deposited into GenBank with accession nos. available from Table S6.
