# Supplementary material for: Development of Highly Efficient Universal Pneumocystis Primers and Their Application in Investigating the Prevalence and Genetic Diversity of Pneumocystis in Wild Hares and Rabbits
Source: J Fungi (Basel). 2024 May 15;10(5):355. doi: 10.3390/jof10050355 (PMC11121927; doi:10.3390/jof10050355)
Supplement: Supplementary file 1 [file jof-10-00355-s001.zip]

Archive with 12 entries (12 files):
- Figure S1_mtLSU alignment and primers.pdf
- Figure S2_mtSSU alignment and primers.pdf
- Figure S3_ITS alignment and primers.pdf
- Figure S4_Phare mtLSU variants.pdf
- Figure S5_Pory and Phare dhps.pdf
- Figure S6_dhps and rDNA trees.pdf
- Table S1_Metadata for hares and rabbits.pdf
- Table S2_PCR primers.pdf
- Table S3_Samples for primer tests.pdf
- Table S4_Sequence identity matrix.pdf
- Table S5_Sequence distance matrix.pdf
- Table S6_GenBank Nos.pdf
